# Supplementary figures and images for: Mechanical signatures of microbial biofilms in micropillar-embedded growth chambers
Source: Royal Society of Chemistry journal article supplement (doi:10.1039/c5sm02755a), 2016-01-01

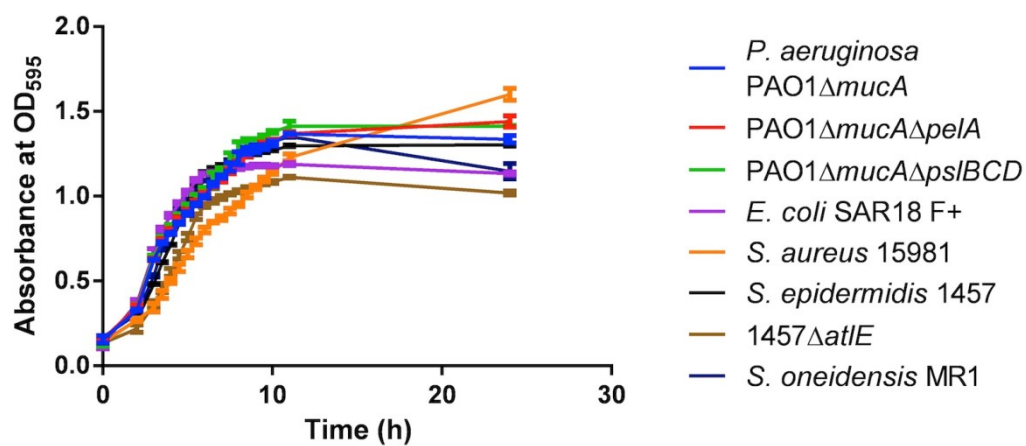

Fig. S1. Mean and standard deviation of planktonic growth rates of the various bacterial strains.

Supplement: c5sm02755a1.pdf [file c5sm02755a1.pdf]
